# Supplementary material for: Carbon Intensity Disclosure and Corporate Credit Spreads
Source: Research Square preprint supplement (doi:10.21203/rs.3.rs-8568592/v1), 2026-01-30
Supplement: Supplementary file 1 [file 65c5e9e362cb0792973585e8.pdf]

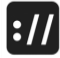

## SUPPORTING INFORMATION FOR:

Schoeffel, A., Mueller, L., Kiesel, F., Trautmann, C. & Schiereck, D. Carbon Intensity Disclosure and Corporate Credit Spreads. *Journal of Industrial Ecology*.

### Summary

This supporting information outlines the details of our implementation of yield spreads, term structure slope, liquidity measure, firm-level controls, and Merton model probabilities of default.

## Supporting Information S1: Implementation details

This supporting information outlines the details of our implementation of yield spreads, term structure slope, liquidity measure, firm-level controls, and Merton model probabilities of default.

### S1.1 Liquidity measure

We use price dispersion as introduced by Jankowitsch (2011) to proxy for the illiquidity of corporate bonds. The daily measure is defined as

$$Price\ Disp. = \sqrt{\frac{1}{\sum_{k=1}^{K_{it}} v_{ikt}} \sum_{k=1}^{K_{it}} (p_{ikt} - m_{it})^2 v_{ikt}}$$

with  $K_{it}$  the number of traded prices  $p_{ikt}$  with trading volumes  $v_{ikt}$  and  $m_{it}$  the daily closing price. We take the average of all daily measures in a given month to arrive at our monthly measure of illiquidity.

### ***S1.2 Firm-level controls***

We retrieve stock market data from CRSP (Center for Research in Security Prices, 2025) for the period from 2016 to 2021 and calculate market capitalizations and annualized trailing 6-month stock price volatilities for all firms and days in our sample period. For financials, we follow the typical filter conventions to retrieve data from Compustat (Standard and Poor's, 2025), i.e., we filter for consolidated financial statement information in the industrial standard format reported in USD between 2016 and 2021. We calculate the operating income to sales ratio as EBITDA divided by net revenues. We calculate the leverage ratio as total debt (calculated as long-term debt plus debt in current liabilities) divided by the sum of total debt and market capitalization. The long-term debt to asset ratio is defined as long-term debt divided by total assets. We calculate the pretax interest coverage ratio as EBIT divided by interest expenses. As in Dick-Nielsen et al. (2012) and Blume et al. (1998), we control for the skewed distribution of this ratio using four dummy variables. The first dummy is set to the coverage ratio if it is less than 5 and 5 if it is above. The second dummy is set to zero if the coverage ratio is below 5, to the coverage ratio minus 5 if it lies between 5 and 10, and 5 if it lies above. The third dummy is set to zero if the coverage ratio is below 10, to the coverage ratio minus 10 if it lies between 10 and 20, and 10 if it lies above. The fourth dummy is set to zero if the coverage ratio is below 20 and is set to the coverage ratio minus 20 if it lies above 20 (truncating the dummy value at 80).

### ***S1.3 Merton model probabilities of default***

We use the Merton (1974) model to calculate risk-neutral implied default probabilities. To do that, we must assume that the total value of the firm  $V$  follows a geometric Brownian motion:

$$dV = \mu_V V dt + \sigma_V V dW,$$

where  $\mu_V$  is the expected return on the value of the firm,  $\sigma_V$  is the volatility of the firm's value, and  $dW$  is an increment of the standard Wiener process. Under the assumption that the firm has issued a single zero-coupon bond of amount  $D$  (constructed as short-term debt plus 0.5 times long-term debt, see Xia & Zulaica, 2022) and with maturity  $T$  (assumed to be five years), the value of the firm's equity  $E$  can be calculated from the Black-Scholes option pricing formula as the price of a call option like this:

$$E = V\Phi(d_1) - e^{-rT}D\Phi(d_2), \quad \text{with}$$

$$d_1 = \frac{\ln(V/D) + (r + 0.5\sigma_V^2)T}{\sigma_V\sqrt{T}}, \quad d_2 = d_1 - \sigma_V\sqrt{T},$$

where  $r$  is the risk-free rate and  $\Phi(\cdot)$  is the cumulative standard normal distribution function. We draw the value of equity from CRSP market capitalization, the amount of debt from Compustat, the risk-free rate from FRED (daily constant maturity 1-year treasury rate; Federal Reserve Bank of St. Louis, 2025), and assume  $T$  to be five years. Thus, there remain two unknowns in this equation, i.e.,  $\sigma_V$  and  $V$ . The typical way to solve this is to

use Ito's Lemma and the call delta  $\delta E / \delta V = \Phi(d_1)$  to derive the following relationship between  $\sigma_V$  and  $V$  and facilitate a solution to the resulting system of equations:

$$\sigma_E = \left( \frac{V}{E} \right) (d_1) \sigma_V$$

As Xia and Zulaica (2022), however, we follow Gilchrist and Zakrajsek (2012) and Bharath and Sumway (2008) to employ an iterative procedure that is more flexible if a firm's volatility is highly time-varying. The procedure includes six steps:

1. For each day a stock is traded, we gather the returns and market capitalization of the trailing 250 days.
2. We calculate the 250-day trailing equity volatility from these returns and derive the following initial estimate of  $\sigma_V$ :  $\sigma_{V,initial} = \sigma_E * E / (E + D)$ .
3. For each of the 250 trailing days, we solve the Black Scholes equation for  $V$  using  $\sigma_{V,initial}$ .
4. We calculate the daily log return on  $V$  for the 250 days in the trailing window.
5. We calculate the average and standard deviation of these returns.
6. We use the average and standard deviation as the new estimates for  $r$  and  $\sigma_V$  and iterate this procedure until the results of iterations converge (i.e., they change less than 0.01 compared to the previous result)

The procedure is relatively resource-intensive; however, most results converge after 3-5 iterations. The result is an estimate of  $\sigma_V$  and  $V$  for each stock-day observation. This can then be used to estimate risk-neutral default probabilities for each stock-day-observation as follows:

$$PD = \Phi \left( -\frac{\ln(V/D) + (r - 0.5\sigma_V^2)T}{\sigma_V\sqrt{T}} \right)$$

The distribution of estimated default probabilities is highly skewed – as expected – with few observations with high default probabilities and the majority of default probabilities below 5% (see Figure S1.1). This distribution is similar to that of Bloomberg’s physical default probabilities.

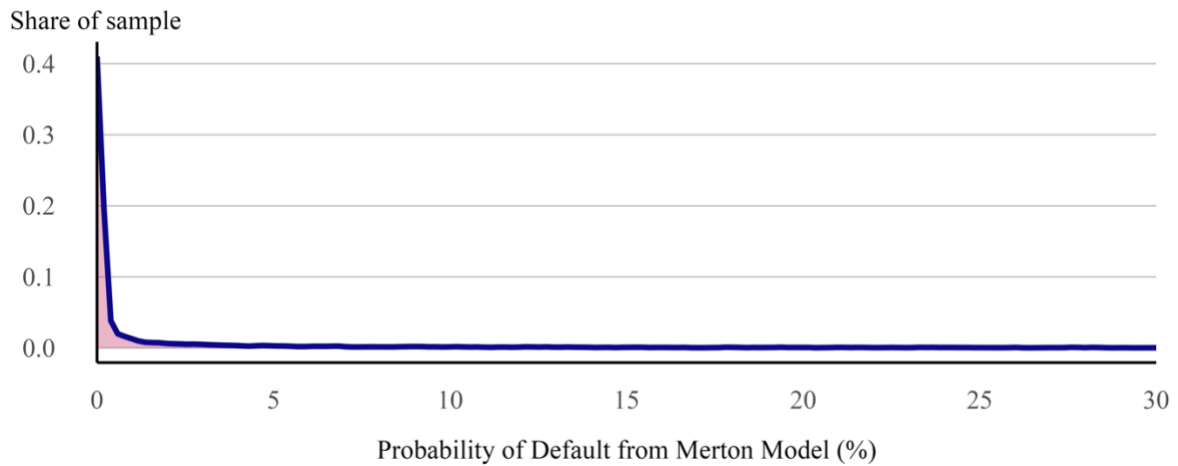

**Figure S1.1** Distribution of Merton model risk-neutral probabilities of default.

#### *S1.4 Sample distribution by rating class*

**Table S1.1** Sample distribution.

| Rating class    | Number of observations | Share of observations in % |
|-----------------|------------------------|----------------------------|
| AAA/AA          | 13,061                 | 6%                         |
| A               | 73,865                 | 35%                        |
| BBB             | 107,090                | 51%                        |
| BB              | 11,636                 | 6%                         |
| B               | 3,456                  | 2%                         |
| Below B (excl.) | 466                    | 0%                         |
| <b>Total</b>    | <b>209,572</b>         | <b>100%</b>                |

## References

Bharath, S. T., & Shumway, T. (2008). Forecasting default with the Merton distance to default model. *The Review of Financial Studies*, 21(3), 1339–1369.

Blume, M. E., Lim, F., & MacKinlay, A. C. (1998). The declining credit quality of U.S. corporate debt: Myth or reality? *The Journal of Finance*, 53, 1389–1413. <https://doi.org/10.1111/0022-1082.00057>

Center for Research in Security Prices. (2025). *CRSP Database* [Database record]. Wharton Research Data Services. <https://wrds.wharton.upenn.edu>. Accessed 30 April 2025.

Dick-Nielsen, J., Feldhütter, P., & Lando, D. (2012). Corporate bond liquidity before and after the onset of the subprime crisis. *Journal of Financial Economics*, 103(3), 471–492.

Federal Reserve Bank of St. Louis. (2025). Daily Treasury yield curve rates [Database record]. FRED, Federal Reserve Bank of St. Louis. <https://fred.stlouisfed.org/categories/115>

Gilchrist, S., & Zakrajšek, E. (2012). Credit spreads and business cycle fluctuations. *American Economic Review*, 102(4), 1692–1720.

Jankowitsch, R., Nashikkar, A., & Subrahmanyam, M. G. (2011). Price dispersion in OTC markets: A new measure of liquidity. *Journal of Banking & Finance*, 35(2), 343–357. <https://doi.org/10.1016/j.jbankfin.2010.08.016>

Merton, R. C. (1974). On the pricing of corporate debt: The risk structure of interest rates. *The Journal of Finance*, 29, 449–470.

Standard & Poor's. (2025). *Compustat Database* [Database record]. Wharton Research Data Services. <https://wrds.wharton.upenn.edu>. Accessed 30 April 2025.

Xia, D., & Zulaica, O. (2022). *The term structure of carbon premia* (Working paper). Bank for International Settlements.
