# Supplementary material for: Carbon Intensity Disclosure and Corporate Credit Spreads
Source: Research Square preprint supplement (doi:10.21203/rs.3.rs-8568592/v1), 2026-01-30
Supplement: Supplementary file 1 [file 1810dcc46749b4e58aaeb58f.xlsx]

## Sheet: CoverSheet
Journal of Industrial Ecology – www.wileyonlinelibrary.com/journal/jie
SUPPORTING INFORMATION FOR:
Schoeffel, A., Mueller, L., Kiesel, F., Trautmann, C. & Schiereck, D. Carbon Intensity Disclosure and Corporate Credit Spreads. Journal of Industrial Ecology.
This supporting information provides exact data points for figures provided in the main text and Supporting Information S1.

## Sheet: data_from_figure_1
data_from_figure_1_in_manuscript
Year reported	Emissions ('000 tonnes CO2e)
	Scope 1	Scope 2
2015	9358.66	1465.31
2016	8148.92	1564.69
2017	7646.89	1615.01
2018	7856.16	1440.33
2019	7249.16	1404.41
2020	6667.09	1032.24
2021	7144.64	1073.67

## Sheet: data_from_figure_2
data_from_figure_2_in_manuscript
Industry	Emissions ('000 tonnes CO2e)		Intensity (tonnes CO2e / USDm revenue)
	Scope 1	Scope 2	Scope 1	Scope 2
Utilities	30511.7	563.304	2086.02	41.797
Energy	18763.4	2101.34	463.275	63.9631
Materials	5475.68	1981.78	398.206	140.309
Industrials	3397.57	517.921	146.301	18.0842
Communication Services	565.197	3033.15	4.83766	22.5715
Consumer Discretionary	1217.87	1729.22	25.3423	85.0832
Consumer Staples	1703.29	1080.16	33.9157	23.0807
Information Technology	402.218	1237.13	10.6763	24.7181
Health Care	241.26	324.535	5.16211	5.94152
Financials	16.1787	144.607	0.426392	3.31815

## Sheet: data_from_figure_3
data_from_figure_3_in_manuscript
Window Start	Window End	Full Sample	A	BBB
2017-01-01	2017-07-01	-2.01767	-3.08811	-2.17404
2017-02-01	2017-08-01	-1.96734	-2.81047	-2.09241
2017-03-01	2017-09-01	-2.07122	-2.66237	-2.12931
2017-04-01	2017-10-01	-2.09119	-2.4745	-2.01552
2017-05-01	2017-11-01	-2.23458	-2.13114	-2.28671
2017-06-01	2017-12-01	-2.31571	-1.88514	-2.44911
2017-07-01	2018-01-01	-2.56185	-1.79706	-2.6948
2017-08-01	2018-02-01	-2.53729	-1.61832	-2.85369
2017-09-01	2018-03-01	-2.64247	-1.61075	-2.94847
2017-10-01	2018-04-01	-2.82625	-1.94082	-2.9393
2017-11-01	2018-05-01	-2.89819	-2.29028	-2.85141
2017-12-01	2018-06-01	-2.80798	-2.54984	-2.62474
2018-01-01	2018-07-01	-3.03196	-3.41119	-2.58672
2018-02-01	2018-08-01	-3.27436	-3.68958	-2.61017
2018-03-01	2018-09-01	-3.51326	-3.8244	-2.76781
2018-04-01	2018-10-01	-3.62588	-3.64842	-2.90267
2018-05-01	2018-11-01	-3.91322	-3.84095	-3.21225
2018-06-01	2018-12-01	-4.34323	-4.04509	-3.73469
2018-07-01	2019-01-01	-4.71672	-4.0433	-4.14037
2018-08-01	2019-02-01	-4.65465	-3.98798	-4.41695
2018-09-01	2019-03-01	-4.52634	-4.05777	-4.63687
2018-10-01	2019-04-01	-4.41849	-4.43232	-4.78795
2018-11-01	2019-05-01	-3.9811	-4.53932	-4.46318
2018-12-01	2019-06-01	-3.52157	-4.72702	-4.25403
2019-01-01	2019-07-01	-2.87058	-4.50641	-3.67427
2019-02-01	2019-08-01	-2.70863	-4.90179	-3.21945
2019-03-01	2019-09-01	-2.46393	-4.90988	-2.90022
2019-04-01	2019-10-01	-2.22122	-5.21532	-2.4068
2019-05-01	2019-11-01	-2.11079	-5.53277	-2.17068
2019-06-01	2019-12-01	-1.96384	-5.64194	-1.80129
2019-07-01	2020-01-01	-1.94065	-5.86906	-1.59198
2019-08-01	2020-02-01	-1.90351	-5.83536	-1.37275
2019-09-01	2020-03-01	-1.67921	-5.93541	-0.853491
2019-10-01	2020-04-01	-1.02353	-6.39356	0.500147
2019-11-01	2020-05-01	-0.627266	-6.85297	1.23104
2019-12-01	2020-06-01	-0.58183	-7.04761	1.42043
2020-01-01	2020-07-01	-0.360169	-7.83769	1.37028
2020-02-01	2020-08-01	-0.363507	-8.82637	1.79885
2020-03-01	2020-09-01	-0.478437	-10.4257	1.96633
2020-04-01	2020-10-01	0.177204	-6.95037	2.59898
2020-05-01	2020-11-01	0.246219	-5.52324	2.25741
2020-06-01	2020-12-01	-0.236938	-4.95346	2.20314
2020-07-01	2021-01-01	-0.858445	-4.28963	2.09197
2020-08-01	2021-02-01	-0.633836	-4.40858	2.28714
2020-09-01	2021-03-01	-0.68295	-4.65598	2.19559
2020-10-01	2021-04-01	-0.669555	-4.76857	2.26771
2020-11-01	2021-05-01	-0.675522	-4.69601	2.27329
2020-12-01	2021-06-01	-0.599903	-4.63994	1.9674
2021-01-01	2021-07-01	-0.615109	-4.60983	1.51121
2021-02-01	2021-08-01	-0.8481	-4.82937	1.19767
2021-03-01	2021-09-01	-0.966867	-4.77814	0.9222
2021-04-01	2021-10-01	-0.9869	-4.73748	0.832516
2021-05-01	2021-11-01	-0.948251	-4.8102	0.965591
2021-06-01	2021-12-01	-0.782749	-4.72899	0.846282
2021-07-01	2022-01-01	-1.00722	-4.82731	0.531923
2021-08-01	2022-02-01	-1.19319	-4.88096	0.331952
2021-09-01	2022-03-01	-1.37053	-4.90419	0.171308
2021-10-01	2022-04-01	-1.66177	-5.00083	-0.138965
2021-11-01	2022-05-01	-2.06196	-5.17324	-0.662342
2021-12-01	2022-06-01	-2.72086	-5.44274	-1.13697
2022-01-01	2022-07-01	-2.82122	-5.66903	-1.33062
2022-02-01	2022-08-01	-3.1725	-5.94377	-1.67263
2022-03-01	2022-09-01	-3.38587	-5.97104	-1.91562
2022-04-01	2022-10-01	-3.60392	-6.29964	-2.06876
2022-05-01	2022-11-01	-3.82147	-6.27753	-2.33175
2022-06-01	2022-12-01	-3.45195	-6.03824	-1.93278
2022-07-01	2023-01-01	-3.53063	-5.90161	-2.00704

## Sheet: data_from_figure_S1_1
data_from_figure_S1.1_in_supporting_information_1
Merton PD (%)	Sample share		Merton PD (%)	Sample share		Merton PD (%)	Sample share
0	0.4101		10.18	0.0018		20.35	0.0004
0.2	0.1966		10.37	0.0016		20.55	0.0005
0.39	0.0382		10.57	0.0014		20.74	0.0006
0.59	0.02		10.76	0.0015		20.94	0.0009
0.78	0.0163		10.96	0.0012		21.13	0.0009
0.98	0.0131		11.15	0.001		21.33	0.0007
1.17	0.0099		11.35	0.0013		21.53	0.0008
1.37	0.008		11.55	0.0013		21.72	0.0008
1.57	0.0076		11.74	0.0011		21.92	0.0006
1.76	0.0074		11.94	0.0013		22.11	0.0005
1.96	0.0064		12.13	0.0016		22.31	0.0006
2.15	0.006		12.33	0.0016		22.5	0.0007
2.35	0.0057		12.52	0.0013		22.7	0.0006
2.54	0.0053		12.72	0.0016		22.9	0.0005
2.74	0.0055		12.92	0.0013		23.09	0.0006
2.94	0.0051		13.11	0.0012		23.29	0.001
3.13	0.0047		13.31	0.0014		23.48	0.0009
3.33	0.0044		13.5	0.0012		23.68	0.0009
3.52	0.0039		13.7	0.0011		23.87	0.0007
3.72	0.0038		13.89	0.001		24.07	0.0008
3.91	0.0035		14.09	0.0008		24.27	0.0007
4.11	0.003		14.29	0.0008		24.46	0.0007
4.31	0.0026		14.48	0.0009		24.66	0.0007
4.5	0.0031		14.68	0.0007		24.85	0.0005
4.7	0.0035		14.87	0.0009		25.05	0.0005
4.89	0.0032		15.07	0.001		25.24	0.0005
5.09	0.0029		15.26	0.0011		25.44	0.0005
5.28	0.0028		15.46	0.001		25.64	0.0004
5.48	0.0025		15.66	0.0007		25.83	0.0006
5.67	0.002		15.85	0.0008		26.03	0.0008
5.87	0.002		16.05	0.0008		26.22	0.0004
6.07	0.0023		16.24	0.0007		26.42	0.0003
6.26	0.0024		16.44	0.0006		26.61	0.0004
6.46	0.0023		16.63	0.0008		26.81	0.0005
6.65	0.0026		16.83	0.0005		27.01	0.0006
6.85	0.0026		17.02	0.0004		27.2	0.0005
7.04	0.0018		17.22	0.0004		27.4	0.0006
7.24	0.0015		17.42	0.0006		27.59	0.001
7.44	0.0015		17.61	0.0006		27.79	0.0009
7.63	0.0016		17.81	0.0011		27.98	0.0005
7.83	0.0016		18	0.001		28.18	0.0009
8.02	0.0016		18.2	0.0008		28.37	0.0007
8.22	0.0015		18.39	0.0005		28.57	0.0004
8.41	0.0016		18.59	0.0007		28.77	0.0003
8.61	0.0018		18.79	0.0007		28.96	0.0004
8.81	0.0019		18.98	0.0008		29.16	0.0004
9	0.002		19.18	0.0008		29.35	0.0003
9.2	0.002		19.37	0.0011		29.55	0.0003
9.39	0.0016		19.57	0.0008		29.74	0.0003
9.59	0.0016		19.76	0.0008		29.94	0.0003
9.78	0.0014		19.96	0.0008
9.98	0.0016		20.16	0.0008
